# Supplementary material
Source: publisher site journal article supplement (https://kjim.org/upload/media/kjim-2024-053-Supplementary-Material.pdf)
Supplement: Supplementary file 1 [file kjim-2024-053-Supplementary-Material.pdf]

**Supplementary Material. The Korean version of the questionnaire and educational materials**

아래 각각의 질문에 한 가지 답만을 골라주십시오.

1. 귀하는 과거에 대변이식에 대해 들어본 적이 있습니까?
  - 1) 예
  - 2) 아니오
  - 3) 잘 모르겠음
2. 궤양성 대장염의 치료로 대변이식을 할 의향이 있습니까?
  - 1) 예
  - 2) 아니오
  - 3) 잘 모르겠음
3. 궤양성 대장염의 치료로 대변이식 후 치료 효과가 좋았다는 다른 환자들의 얘기를 듣는다면 해당 치료를 받을 의향이 있습니까?
  - 1) 예
  - 2) 아니오
  - 3) 잘 모르겠음

다음은 대변이식에 관한 내용입니다. 모두 읽은 후 다음 페이지의 질문에 답하여 주시기 바랍니다.

1. 대변이식이란 무엇인가요?  
대변이식은 건강한 대변공여자로부터 획득한 장내 미생물총을 질병에 의해 변화된 미생물총을 가진 환자의 위장관에 주입(이식)하여 장내 미생물총 불균형을 회복시킴으로써 그 치료 효과를 얻고자 하는 방법입니다.
2. 대변이식은 어떤 질환에서 시행할 수 있나요?  
대변이식은 재발성 또는 불응성 클로스트리듐(*Clostridioides difficile*) 감염에서 높은 치료율, 낮은 재발율 및 안전성을 보여 현재 가장 효과적인 치료로 인정받고 있습니다. 그 외에도 만성염증성장질환(궤양성 대장염, 크론병), 기능성질환(과민성장증후군, 변비 등), 알콜성간질환 등의 소화기 질환 및 대사증후군, 비만, 당뇨, 동맥경화증, 다발성 경화증 등의 다양한 질환에서 시행되고 있으며 전세계적으로 적응증이 점차 확대되고 있습니다. 다만, 국내에서는 의료 정책 상 대변이식이 아직까지 궤양성 대장염의 치료로 인정되고 있지 않은 실정입니다.
3. 대변기증자의 선택과 검사는 어떻게 진행되나요?  
이식대변의 선택에는 환자가 선택하는 방법과 익명의 기증자를 이용하는 두 가지 방법이 있고, 최근 연구 결과 대변이식 효과가 환자선택 기증자와 익명의 기증자 사이에 차이가 없는 것으로 나타났습니다. 적절한 대변이식 기증자를 선택하기 위해 고려해야 할 점은 이식대변과 연관된 부작용의 감소와 예방입니다. 이를 위해 대변기증자는 1차 인터뷰를 통해 병력(항생제 복용력, 소화기질환, 감염질환, 자가면역질환, 아토피, 만성 통증 증후군, 신경질환, 정신과 질환, 대사 증후군, 비만, 영양실조, 악성종양 등 24개 질문)을 확인하여 건강인만 선별한 후, 감염성 병원체에 대한 혈액검사(16개 항목)와 세균, 바이러스 등(12개 항목)에 대한 대변검사를 통해 엄격한 기증자를 최종적으로 선정하게 됩니다.
4. 궤양성 대장염에서 대변이식의 효과는 어떤가요?  
현재까지 잘 디자인된 연구 결과, 궤양성 대장염 환자에서 대변이식 시행한 경우와 시행하지 않은 경우를 비교하였을 때, 8주째 임상관해율(대변이식군 37% vs. 치료받지 않은 군 18%)과 임상반응율(대변이식군 49% vs. 치료받지 않은 군 28%)이 모두 대변이식군에서 더 높게 나타났습니다. 또한, 스테로이드 치료나 수술이 필요한 염증성장질환의 악화나 거대세포바이러스 감염, 소장 천공, 폐렴 등의 중증 부작용은 두 군에서 유사하게 관찰되었습니다(대변이식군 7% vs. 치료받지 않은 군 5%). 체계적 문헌고찰에서 대변이식 후 부작용은 28.5%에서 관찰되었고, 경미한 소화기계 부작용이 대부분이었으며 가장 많은 부작용은 복부불편감이었습니다. 만성염증성장질환 환자만을 대상으로 대변이식과 관련된 부작용에 대해 분석하였을 때, 대변이식 후 염증성장질환의 악화는 4.6%에서 관찰되었고 이는 중복감염, 치료 약제중단 등과도 연관된 것으로 나타났습니다. 즉, 염증성장질환에서 대변이식의 장기 안전성에 대해서는 아직 축적된 데이터가 부족한 실정이지만 현재까지는 비교적 안전한 것으로 여겨지고 있습니다.

Supplementary Material. Continued

귀하는 대변이식에 관한 정보를 얻은 상태입니다. 아래 질문에 한 가지 답만을 골라주십시오.

4. 귀하는 대변이식에 대한 지식을 얻은 후 궤양성 대장염의 치료로 대변이식을 할 의향이 있습니까?
  - 1) 예
  - 2) 아니오
  - 3) 잘 모르겠음
  
5. 귀하가 대변이식을 받기로 결정하였다면, 대변기증자로 어떤 분을 선호합니까?
  - 1) 가족
  - 2) 배우자
  - 3) 친구
  - 4) 귀하가 지정하는 특정인
  - 5) 익명의 대변기증자
  - 6) 담당의사가 추천하는 대변기증자
  - 7) 기타(구체적으로 기술하여 주세요) \_\_\_\_\_
  
6. 만약 사전 검사를 통해 선별된 익명의 건강한 대변공여자의 대변만을 이식 받을 수 있다면, 귀하는 여전히 대변이식을 할 의향이 있습니까?
  - 1) 예
  - 2) 아니오
  - 3) 잘 모르겠음
  
7. 대변이식을 할 때 다양한 주입방법이 있습니다. 이들이 똑같이 효과적이라고 가정한다면, 귀하가 가장 선호하는 방법이 무엇입니까?
  - 1) 관장을 이용한 주입
  - 2) 대장내시경을 이용한 주입
  - 3) 동결건조 대변 캡슐 제제 복용
  - 4) 어떤 방법이던지 상관 없음
  - 5) 잘 모르겠음
  
8. 귀하는 어떤 경우에 대변이식을 받을 결정을 하겠습니까?
  - 1) 대변이식이 안전한 것으로 판명된 후 이 치료를 고려할 것이다.
  - 2) 대변이식이 효과가 있는 것으로 밝혀지면 이 치료를 고려할 것이다.
  - 3) 현재 사용중인 약물에 대한 부작용이 걱정되기 때문에, 대변이식을 시도해보고 싶다.
  - 4) 약물치료보다 덜 인위적이어서 대변이식을 시도해보고 싶다.
  - 5) 담당의사가 대변이식을 추천한다면 이 치료를 고려할 것이다.
  - 6) 모든 약물 치료에 실패한다면, 수술 전 대변이식을 고려할 것이다.
  - 7) 현재 약물 용량이나 종류를 줄일 수 있다면, 대변이식을 고려할 것이다.
  
9. 귀하는 대변이식에 대해 가장 염려하는 것은 무엇입니까?
  - 1) 대변이식 후 감염될까봐 걱정된다.
  - 2) 대변이식 후 치료 효과가 없을까봐 걱정된다.
  - 3) 대변이식 방법 자체가 혐오스럽다.
  - 4) 잘 모르겠다.
  
10. 대변이식의 안전성과 관련하여 가장 염려하는 것은 무엇입니까?
  - 1) 기증받는 대변 자체의 위생이 걱정된다.
  - 2) 기증받는 대변과 관련된 감염질환에 대한 철저히 사전검사가 이루어지지 않았을까 걱정된다.

### Supplementary Material. Continued

- 3) 주입 방법이 안전하지 않을까 걱정이다.
  - 4) 대변이식 후 궤양성 대장염이 오히려 악화될까 걱정이다.
  - 5) 대변이식이 현재 궤양성 대장염 치료에 방해가 될까 걱정이다.
  - 6) 특별히 걱정되는 점이 없다.
11. 대변이식 효과와는 상관없이 국내에서는 대변이식이 아직까지 궤양성 대장염의 치료로 인정되고 있지 않습니다. 귀하가 대변이식을 선택하는데 있어 이러한 의료 정책이 영향을 미치겠습니까?
- 1) 예
  - 2) 아니오
  - 3) 잘 모르겠음
12. 귀하는 현재 본인의 궤양성 대장염의 질병상태가 어떻다고 생각합니까?
- 1) 무증상 상태
  - 2) 경미한 질병 상태
  - 3) 중등도의 질병 상태
  - 4) 심한 질병 상태
  - 5) 잘 모르겠음
13. 귀하는 궤양성 대장염으로 인해 고통 받고 있고, 일상적인 삶을 영위하기 어렵다고 생각합니까?
- 1) 아니다.
  - 2) 약간 그렇다.
  - 3) 많이 그렇다.
14. 귀하는 궤양성 대장염이 악화될 지 모른다는 두려움이 있습니까?
- 1) 아니다.
  - 2) 약간 그렇다.
  - 3) 많이 그렇다.
15. 귀하는 현재 치료 약제에 대해 어떻게 생각하십니까?
- 1) 매우 만족함
  - 2) 만족함
  - 3) 보통임
  - 4) 불만족함
  - 5) 매우 불만족함
16. 향후 궤양성 대장염이 악화된다면 다음으로 선호하는 치료 방법은 무엇입니까?
- 1) 신약
  - 2) 대변이식
  - 3) 잘 모르겠음
17. 귀하가 궤양성 대장염의 호전을 위해 개별적으로 시행한 방법들을 모두 골라주십시오. (중복 선택 가능)
- 1) 생선 기름(예, 크릴 오일, 오메가-3 등)
  - 2) (담당의사에게 권유 받지 않은) 비타민 또는 건강보조제
  - 3) 한방치료(예, 한약, 침 등)
  - 4) 운동요법(예, 요가, 필라테스 등)
  - 5) 식이요법(예, 저탄수화물 식이, 저지방 식이 등)
  - 6) 기타(구체적으로 기술하여 주세요)\_\_\_\_\_

Supplementary Material. Continued

18. 지난 3일 동안 하루 평균 정상적으로 보는 배변 횟수보다 얼마나 더 많은 배변을 하였습니까?

- 1) 정상 배변 횟수와 동일
- 2) 정상 배변 횟수보다 1-2회 더 많이 배변
- 3) 정상 배변 횟수보다 3-4회 더 많이 배변
- 4) 정상 배변 횟수보다 5회 이상 더 많이 배변

19. 지난 3일 동안 하루 평균 혈변양은 어느 정도였습니까?

- 1) 전혀 혈변이 없음
- 2) 대변에 피가 약간 보이거나 휴지에 묻어나는 정도임
- 3) 대변에 피가 어느 정도 섞여 보임
- 4) 배변 없이 피만 상당량 배출됨

20. 지난 3일 동안 평균적인 전신 컨디션은 어떠했습니까?

- 1) 매우 좋음
- 2) 평균 이상으로 괜찮음
- 3) 보통임
- 4) 평균보다 약간 안 좋은 상태임
- 5) 최악임

마지막으로 일반사항에 관한 질문입니다. 아래 질문에 답하여 주시기 바랍니다.

21. 최종 학력이 어떻게 되십니까?
- |              |              |
|--------------|--------------|
| 1) 중학교 졸업 이하 | 2) 고등학교 졸업   |
| 3) 대학교 졸업    | 4) 대학원 졸업 이상 |
22. 가구의 년 소득은 대략 어느 정도입니까? (본인이 아닌, 가구 단위 년 소득)
- |              |              |
|--------------|--------------|
| 1) 2천만원 이하   | 2) 2천만원~5천만원 |
| 3) 5천만원~7천만원 | 4) 7천만원~1억원  |
| 5) 1억원 이상    | 6) 잘 모름      |
